# Supplementary material for: Hydration of isocyanates in an expandable, self-assembled capsule
Source: Royal Society of Chemistry journal article supplement (doi:10.1039/c2cc34063a), 2012-01-01
Supplement: c2cc34063a.pdf [file c2cc34063a.pdf]

Electronic supplementary information of

## Hydration of Isocyanates in an Expandable, Self-Assembled Capsule

Toshiaki Taira, Dariush Ajami, Julius Rebek, Jr.\*

The Skaggs Institute for Chemical Biology and Department of Chemistry,  
The Scripps Research Institute,  
10550 N. Torrey Pines Rd, La Jolla, CA 92037

### Experimental

**Materials and General Methods:**  $^1\text{H}$  NMR spectra were recorded on a Bruker DRX-600 spectrometer with a 5 mm QNP probe. Proton ( $^1\text{H}$ ) chemical shifts, reported parts per million (ppm), were indirectly referenced to external tetramethylsilane employing resonance as an internal reference. Deuterated mesitylene was obtained from Cambridge Isotope Laboratories, Inc. All reagents were obtained from commercial supplies and used without further purification.

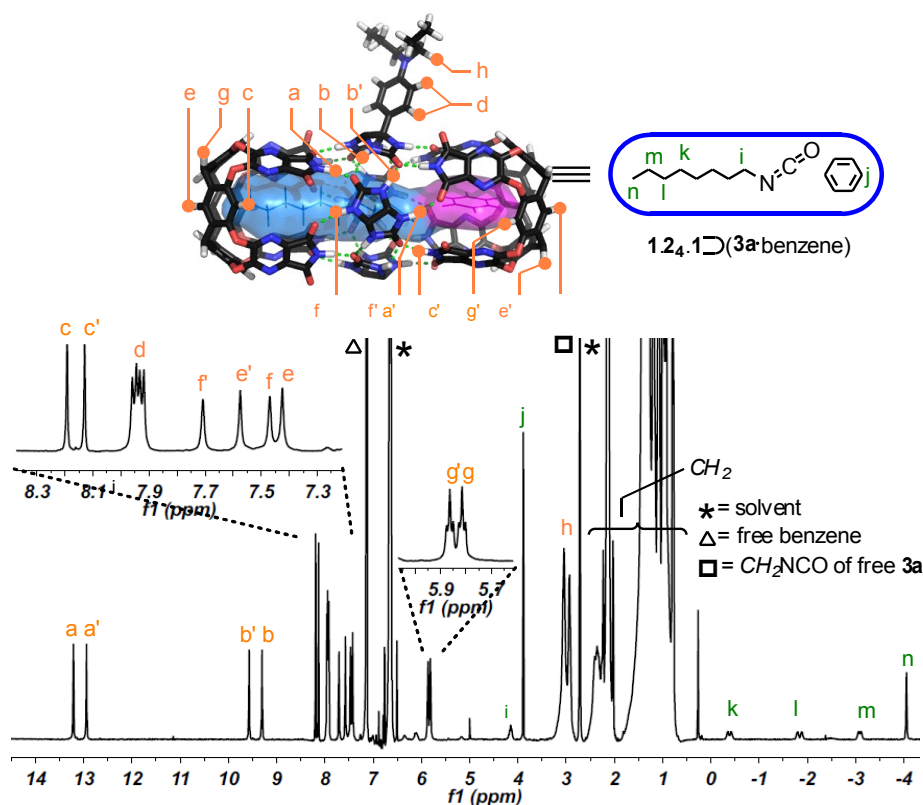

**Fig. S-1**  $^1\text{H}$  NMR spectrum (600 MHz, 300 K, mesitylene- $d_{12}$ ) of  $1.2.1\text{⊃}(3a\cdot\text{benzene})$ .

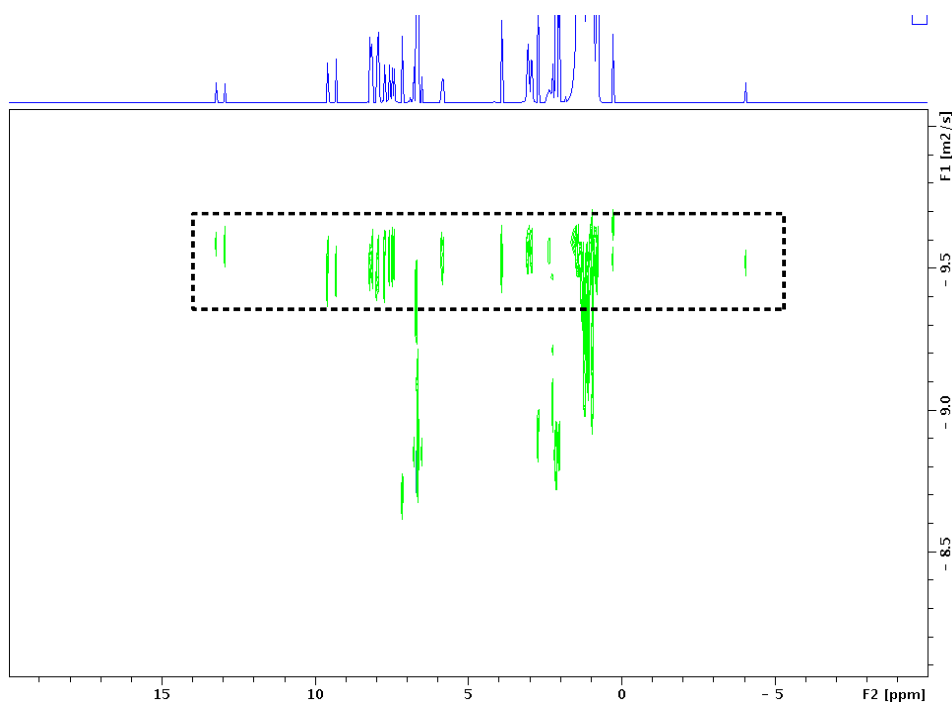

**Fig. S-2**  $^1\text{H}$  DOSY NMR spectrum (300 K, mesitylene- $d_{12}$ ) of  $D_1 = 7.0$  s, 32 steps.

**Table S-1.** Chemical shifts and diffusion coefficients.

| proton          | chemical shift (ppm) | $D$ ( $\text{m}^2/\text{s}$ ) | proton                             | chemical shift (ppm) | $D$ ( $\text{m}^2/\text{s}$ ) |
|-----------------|----------------------|-------------------------------|------------------------------------|----------------------|-------------------------------|
| H <sub>a</sub>  | 13.2                 | $2.90 \times 10^{-10}$        | H <sub>e</sub>                     | 7.42                 | $3.34 \times 10^{-10}$        |
| H <sub>a'</sub> | 12.9                 | $2.98 \times 10^{-10}$        | Free benzene                       | 7.14                 | $2.05 \times 10^{-9}$         |
| H <sub>b</sub>  | 9.58                 | $3.27 \times 10^{-10}$        | H <sub>g'</sub>                    | 5.87                 | $3.39 \times 10^{-10}$        |
| H <sub>b'</sub> | 9.31                 | $3.32 \times 10^{-10}$        | H <sub>g</sub>                     | 5.82                 | $3.33 \times 10^{-10}$        |
| H <sub>c</sub>  | 8.2                  | $3.29 \times 10^{-10}$        | H <sub>j</sub>                     | 3.9                  | $3.4 \times 10^{-10}$         |
| H <sub>c'</sub> | 8.14                 | $3.2 \times 10^{-10}$         | H <sub>h</sub>                     | 3.05                 | $3.14 \times 10^{-10}$        |
| H <sub>d</sub>  | 7.93                 | $3.25 \times 10^{-10}$        | H <sub>h</sub>                     | 2.93                 | $3.28 \times 10^{-10}$        |
| H <sub>f</sub>  | 7.72                 | $3.18 \times 10^{-10}$        | NCH <sub>2</sub> of free <b>3a</b> | 2.72                 | $1.39 \times 10^{-9}$         |
| H <sub>e'</sub> | 7.58                 | $3.14 \times 10^{-10}$        | H <sub>n</sub>                     | -4.05                | $3.26 \times 10^{-10}$        |
| H <sub>f</sub>  | 7.48                 | $3.15 \times 10^{-10}$        |                                    |                      |                               |

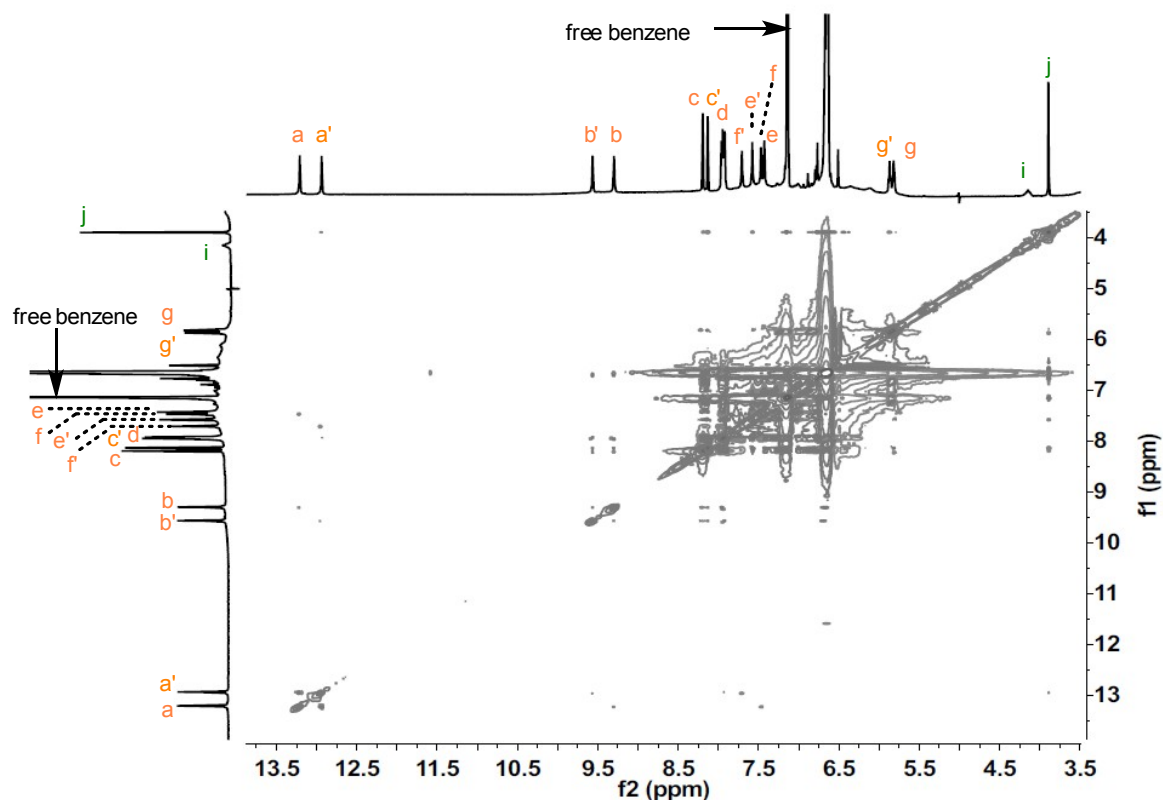

**Fig. S-3** 2D ROESY NMR spectra (600 MHz, 300 K, mesitylene-*d*<sub>12</sub>) of **1.2.4.1**⊃(**3a**·benzene).

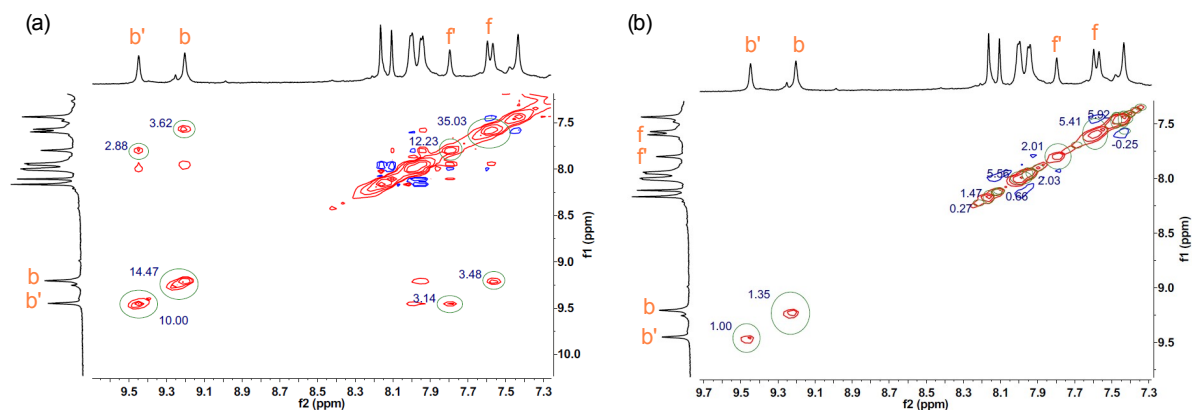

**Fig. S-4** 2D NOESY spectrum (600 MHz, 300 K, mesitylene-*d*<sub>12</sub>) of **1.2.4.1**⊃(**3a**·benzene) showing chemical exchange between H<sub>b</sub> (H<sub>b'</sub>) and H<sub>f</sub> (H<sub>f'</sub>). (a) mixing time 400 ms, (b) mixing time 0 ms. The study of the process by 2D EXSY spectroscopy revealed  $k^{-1}$  value of 0.47 s<sup>-1</sup> corresponding to  $\Delta G^\ddagger = 18.0$  kcal mol<sup>-1</sup> at 300 K.

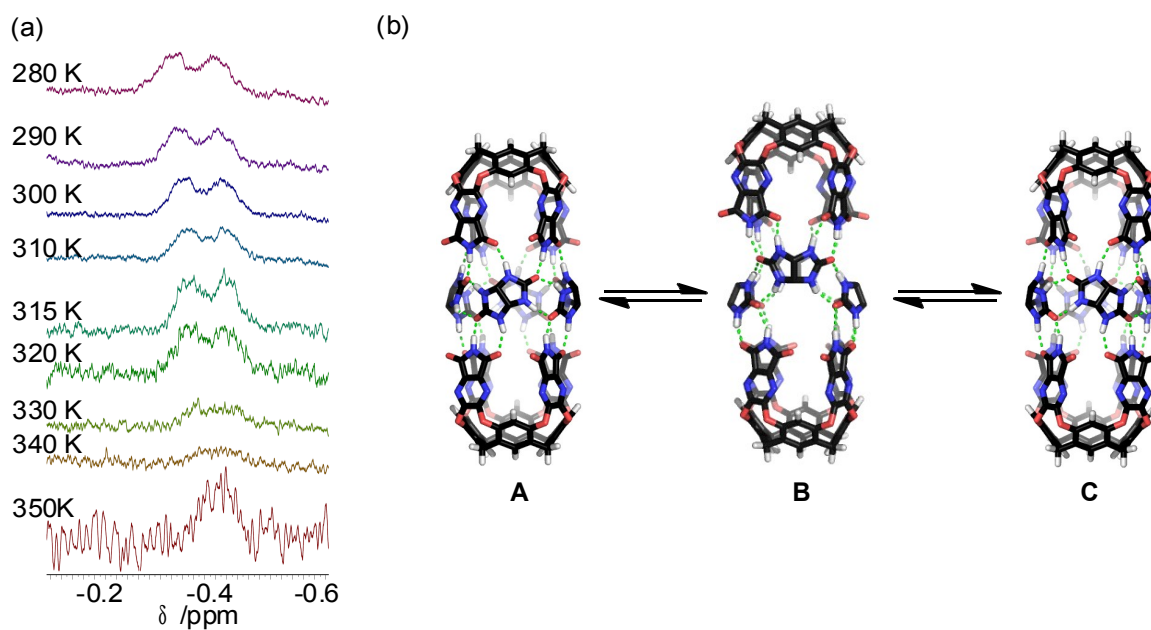

**Fig. S-5** (a) V.T. NMR spectra of of **1.2.4.1**⊃(**3a**·benzene), (b) Racemization of **1.2.4.1**. The diastereotopic signal ( $H_f$ ) coalesce at 330 K, giving  $\Delta G^\ddagger = 17.3 \text{ kcal mol}^{-1}$  corresponding to free energy of activation for racemization.

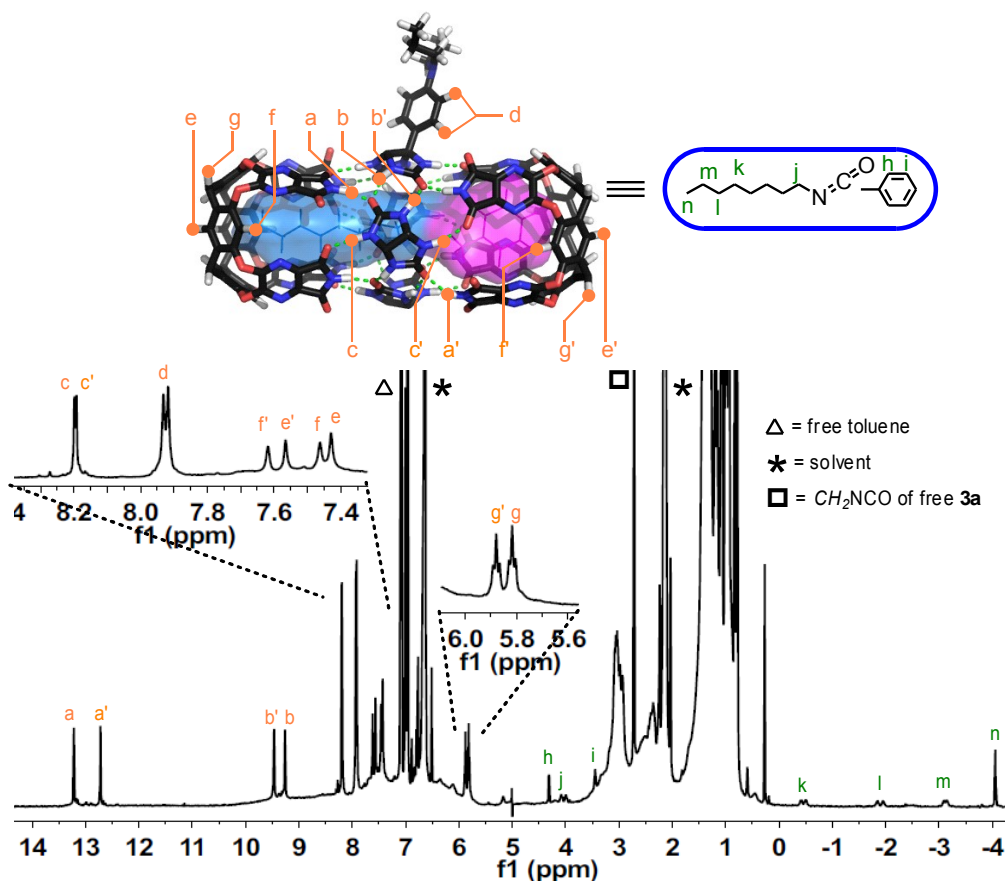

**Fig. S-6**  $^1\text{H}$  NMR spectrum (600 MHz, 300 K, mesitylene- $d_{12}$ ) of **1.2.4.1**⊃(**3a**·toluene).

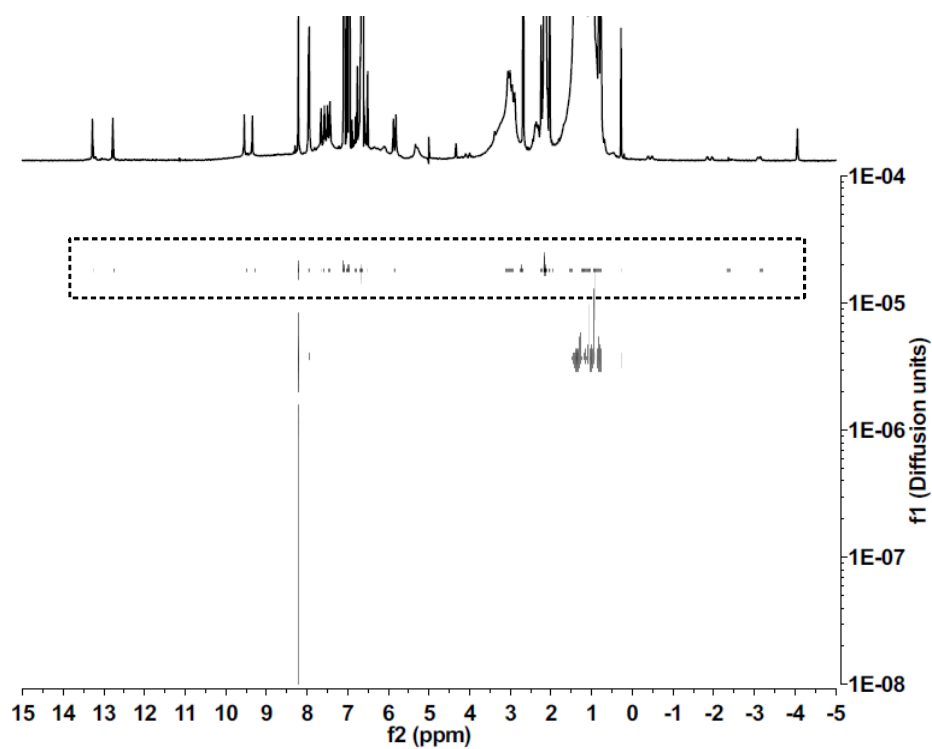

**Fig. S-7**  $^1\text{H}$  NMR spectra (600 MHz, 300 K, mesitylene- $d_{12}$ ) of **1.2.4.1** (3a·toluene).

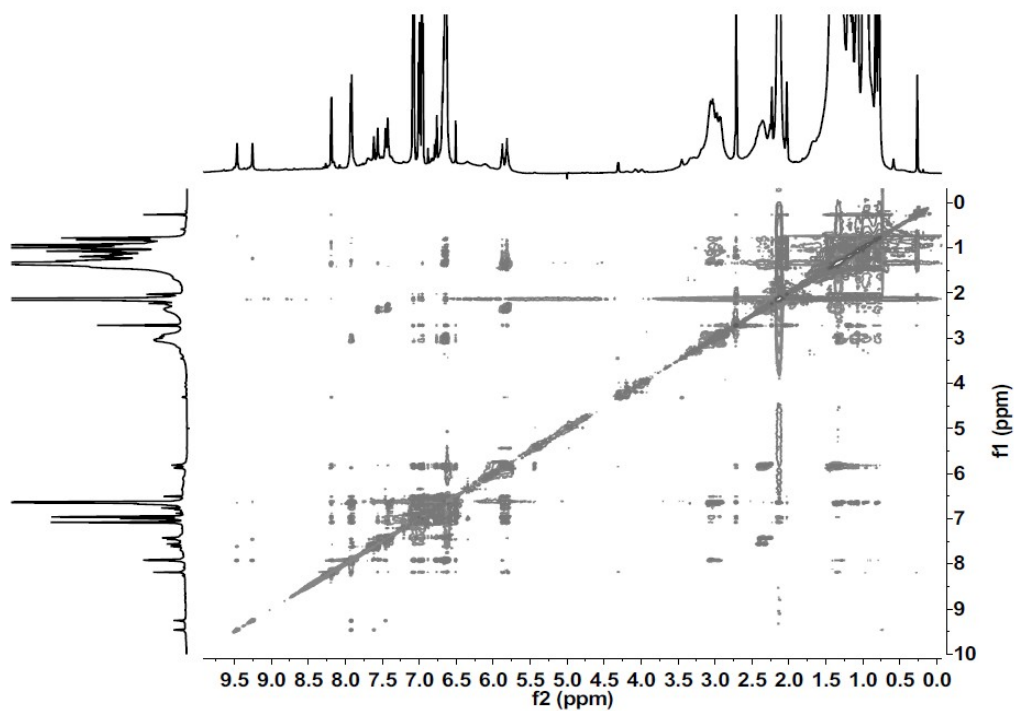

**Fig. S-8** 2D ROESY NMR spectra (600 MHz, 300 K, mesitylene- $d_{12}$ ) of **1.2.4.1** (3a·toluene).

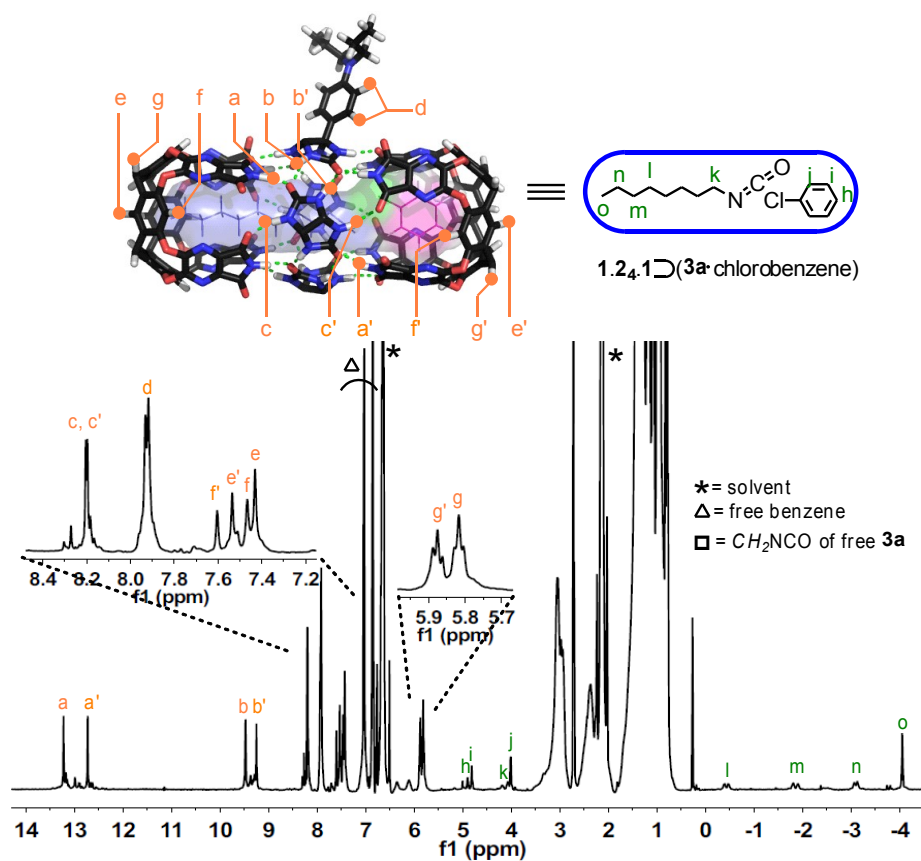

**Fig. S-9** <sup>1</sup>H NMR spectrum (600 MHz, 300 K, mesitylene-*d*<sub>12</sub>) of 1.2.4.1D(3a·chlorobenzene).

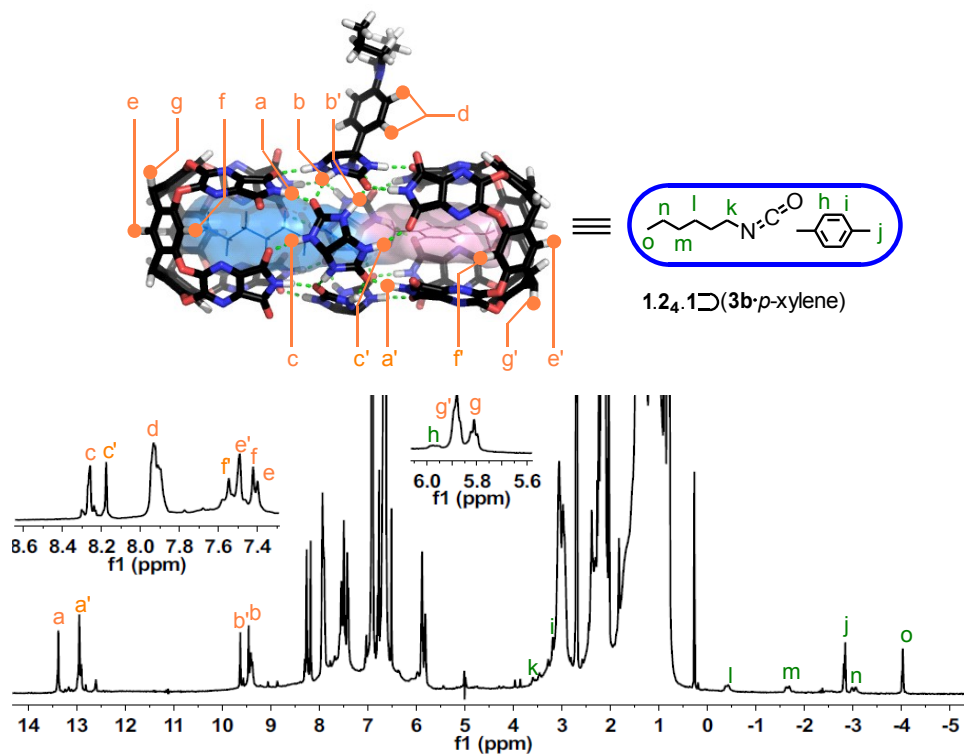

**Fig. S-10** <sup>1</sup>H NMR spectrum (600 MHz, 300 K, mesitylene-*d*<sub>12</sub>) of 1.2.4.1D(3b·*p*-xylene).

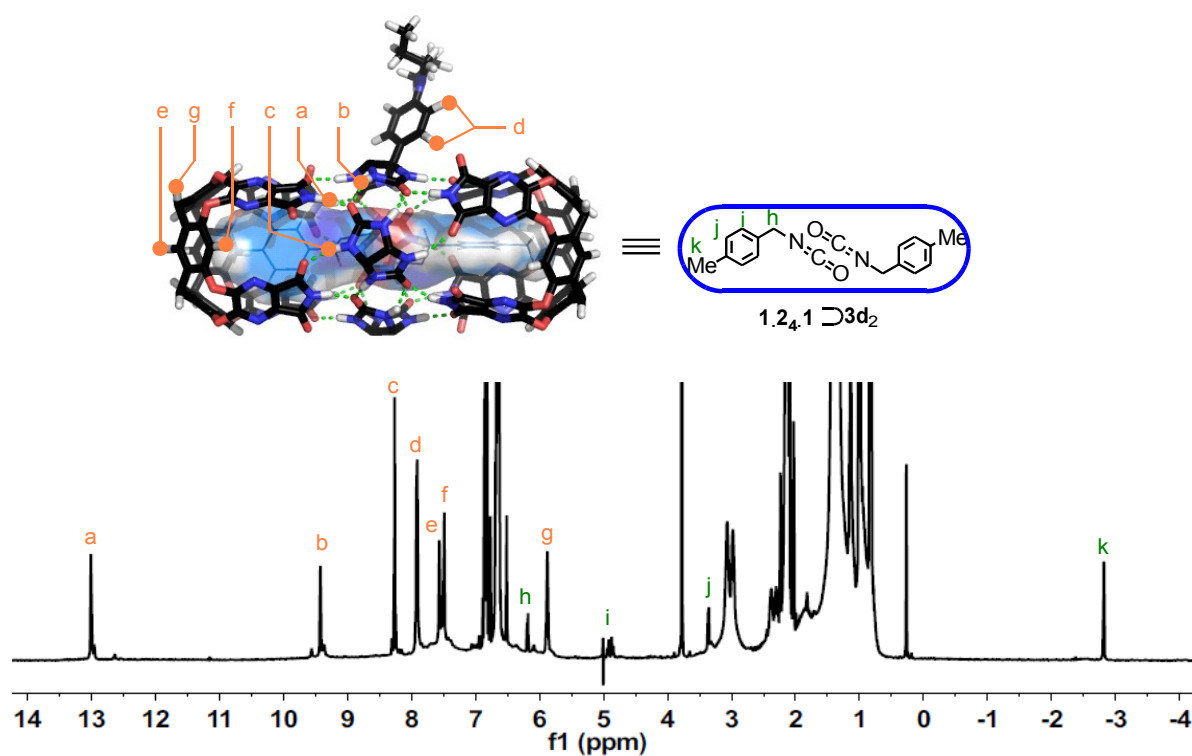

**Fig. S-11** <sup>1</sup>H NMR spectrum (600 MHz, 300 K, mesitylene-*d*<sub>12</sub>) of 1.2.4.1D3d<sub>2</sub>.

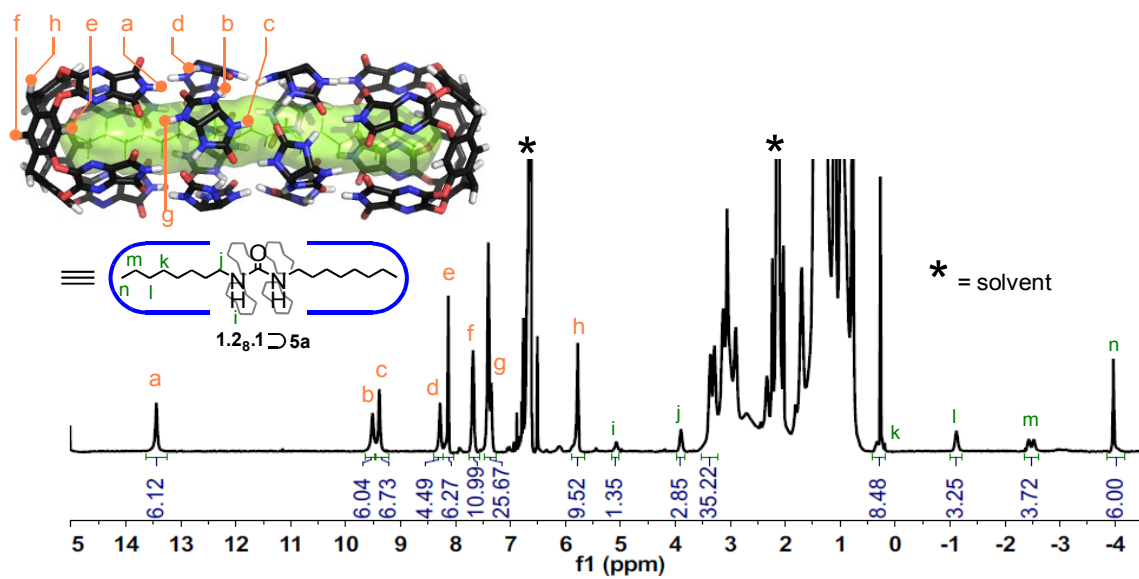

**Fig. S12** <sup>1</sup>H NMR spectrum (600 MHz, 300 K, mesitylene-*d*<sub>12</sub>) of 1.2.8.1D5a.

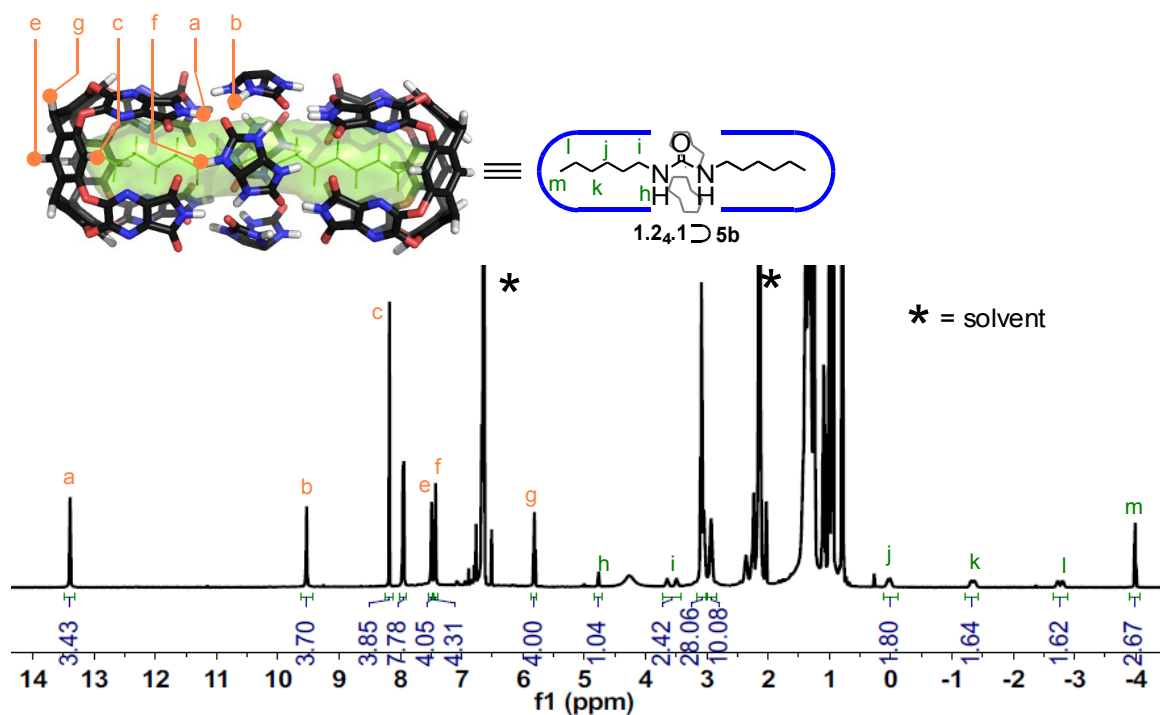

**Fig. S-13**  $^1\text{H}$  NMR spectrum (600 MHz, 300 K, mesitylene- $d_{12}$ ) of **1.2.4.1D5b**.

**Kinetic measurement:** In a typical experiment, samples were prepared for kinetics measurements as follows. To the suspension of **1** (4 mg, 2.4 mM) and **2** (3 mg, 5.2 mM) in mesitylene- $d_{12}$  (0.5 mL) in an NMR tube, stock solution of isocyanate was added. The mixture was heated for a second and then sonicated for several minutes to give a solution. The spectra were periodically acquired while the sample was kept at room temperature (298 K). The parameters for data acquisition of the kinetic experiments were set as  $d_1 = 15$  sec. The concentrations of starting material, intermediate (carbamic acid), and product ( $N,N'$ -dialkylurea) were monitored by integration of their peaks of  $\text{CH}_3$  protons. Concentrations were tabulated with respect to time. Control experiments were carried out under the same conditions but in the absence of **1**, absence of **2** or absence of **1** and **2**. Simulations were based on a consecutive reaction of two irreversible first-order reactions  $\text{A} \rightarrow \text{B} \rightarrow \text{C}$ , where A, B and C are starting material, intermediate and product, respectively.



**Table S-2.** Reaction of isocyanate in self-assembled capsule.

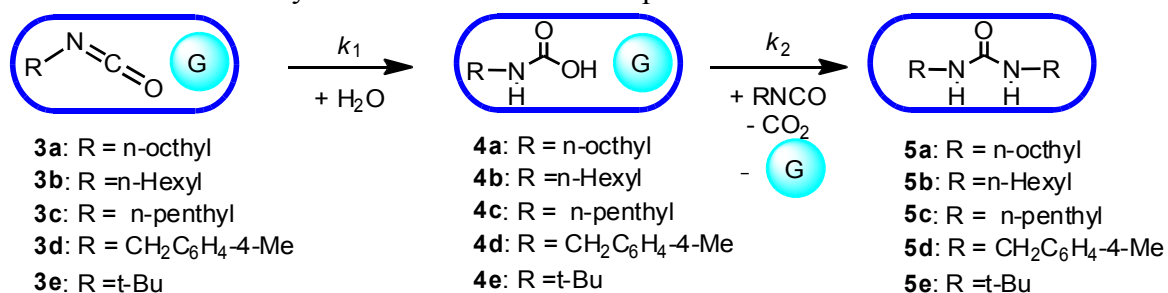

| Entry | isocyanate | G                                | Host           | PC (%) | conv. <sup>b</sup> (%) | $k_1$ (x 10 <sup>-7</sup> s <sup>-1</sup> ) | $k_2$ (x 10 <sup>-7</sup> s <sup>-1</sup> ) |
|-------|------------|----------------------------------|----------------|--------|------------------------|---------------------------------------------|---------------------------------------------|
| 1     | <b>3a</b>  | C <sub>6</sub> H <sub>6</sub>    | <b>1.2.4.1</b> | 47     | 31                     | 1.2                                         | 2.2                                         |
| 2     | <b>3a</b>  | C <sub>6</sub> H <sub>5</sub> Me | <b>1.2.4.1</b> | 50     | 78                     | 4.0                                         | 3.0                                         |
| 3     | <b>3a</b>  | C <sub>6</sub> H <sub>5</sub> Cl | <b>1.2.4.1</b> | 49     | 90                     | 8.5                                         | 6.5                                         |
| 5     | <b>3b</b>  | <i>p</i> -xylene                 | <b>1.2.4.1</b> | 47     | 100                    | 5.0 <sup>c</sup>                            | 0.0                                         |
| 6     | <b>3c</b>  | –                                | <b>1.2.4.1</b> | –      | 0                      | –                                           | –                                           |
| 7     | <b>3d</b>  | <b>3d</b>                        | <b>1.2.4.1</b> | 53     | 0                      | –                                           | –                                           |
| 8     | <b>3e</b>  | <b>3e</b>                        | <b>1.1</b>     | 53     | 0                      | –                                           | –                                           |

<sup>a</sup> In mesitylene-*d*<sub>12</sub> at 294 K. <sup>b</sup> conversions (conv.) were determined by <sup>1</sup>H NMR spectroscopy. <sup>c</sup>  $k_1$  was obtained as initial rate constant.

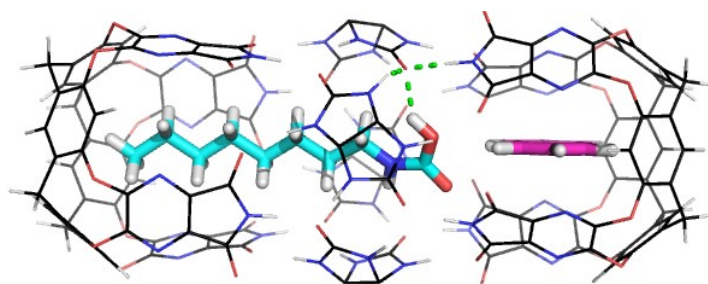

**Fig. S-14** Energy-minimized structures (Spartan, PM3) of **1.2.4.1**⊃(**4a**·benzene). The molecular modeling suggests the **4a** can be stabilized by hydrogen bonding interactions between **4a** and host framework.

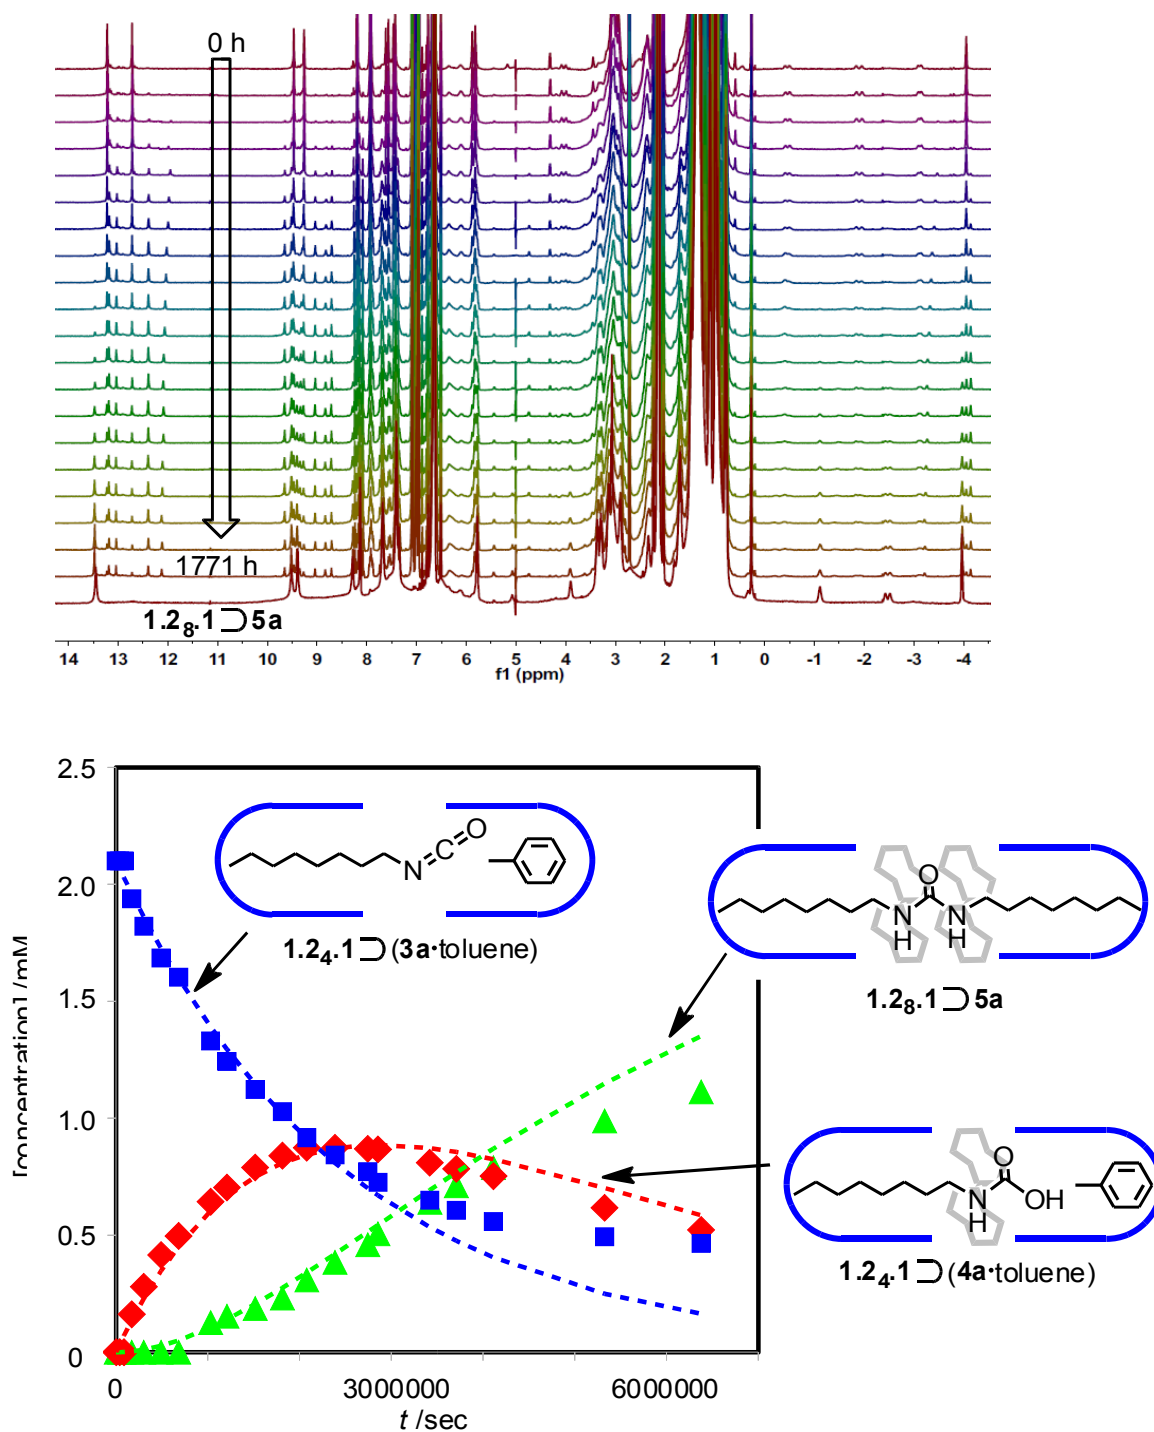

**Fig. S-15** Reaction profile of 1.2.4.1 (3a·toluene). The curves calculated by assuming consecutive and nonlinear fitting using integrations of CH<sub>3</sub> proton of each components.

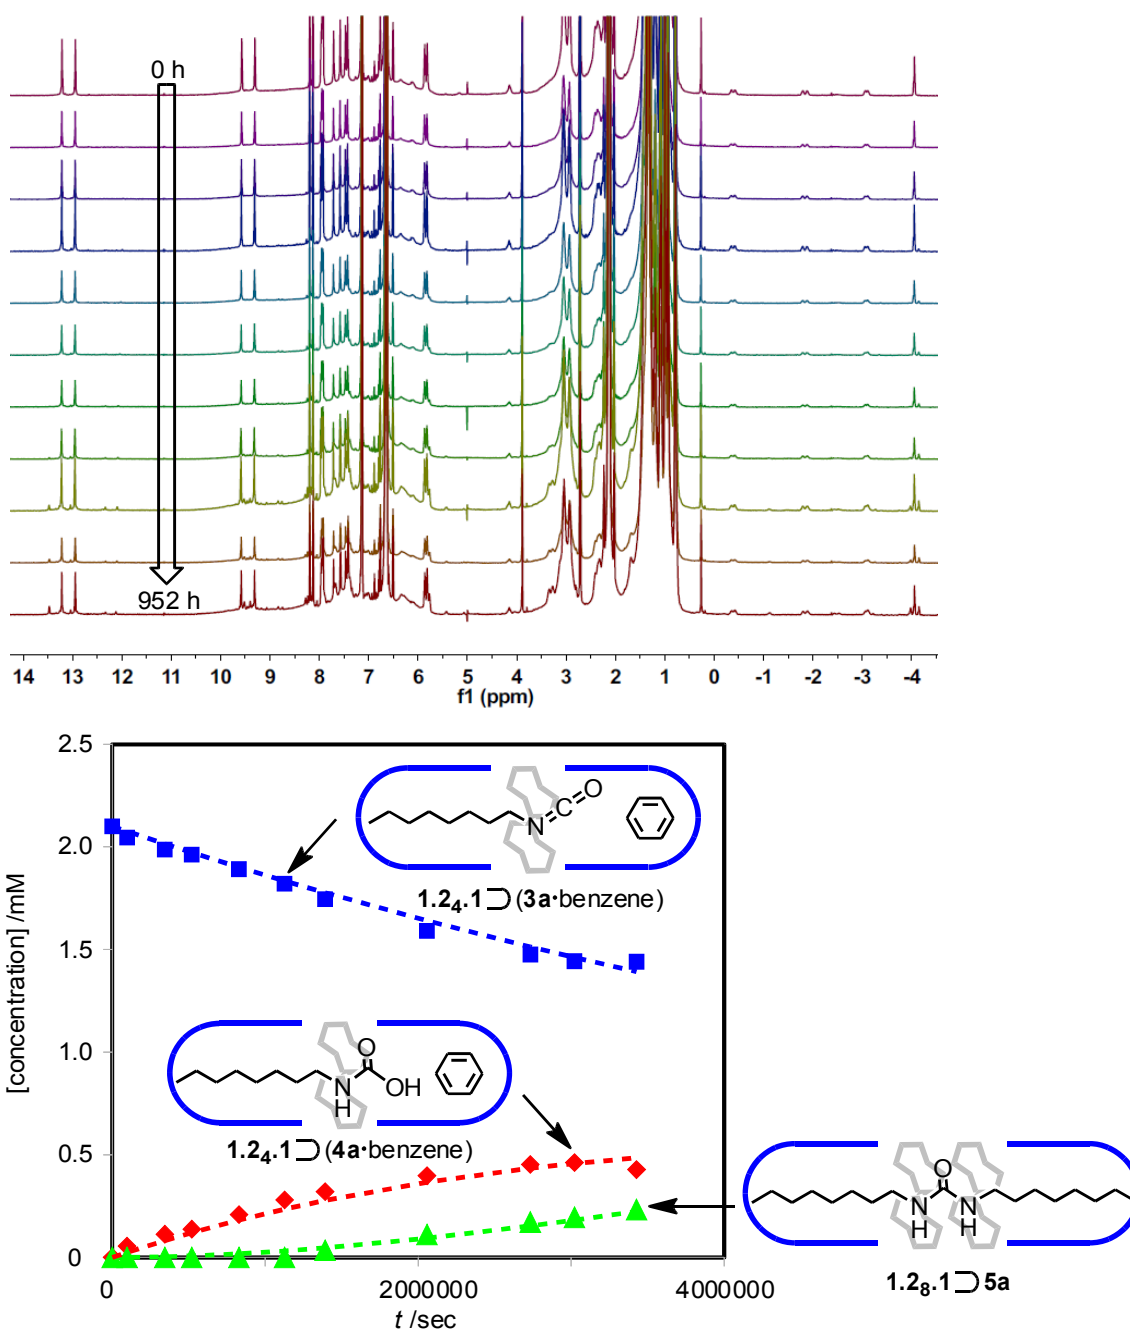

**Fig. S-16** Reaction profile of 1.2.4.1(3a·benzene). The curves calculated by assuming consecutive and nonlinear fitting using integrations of CH<sub>3</sub> proton of each components.

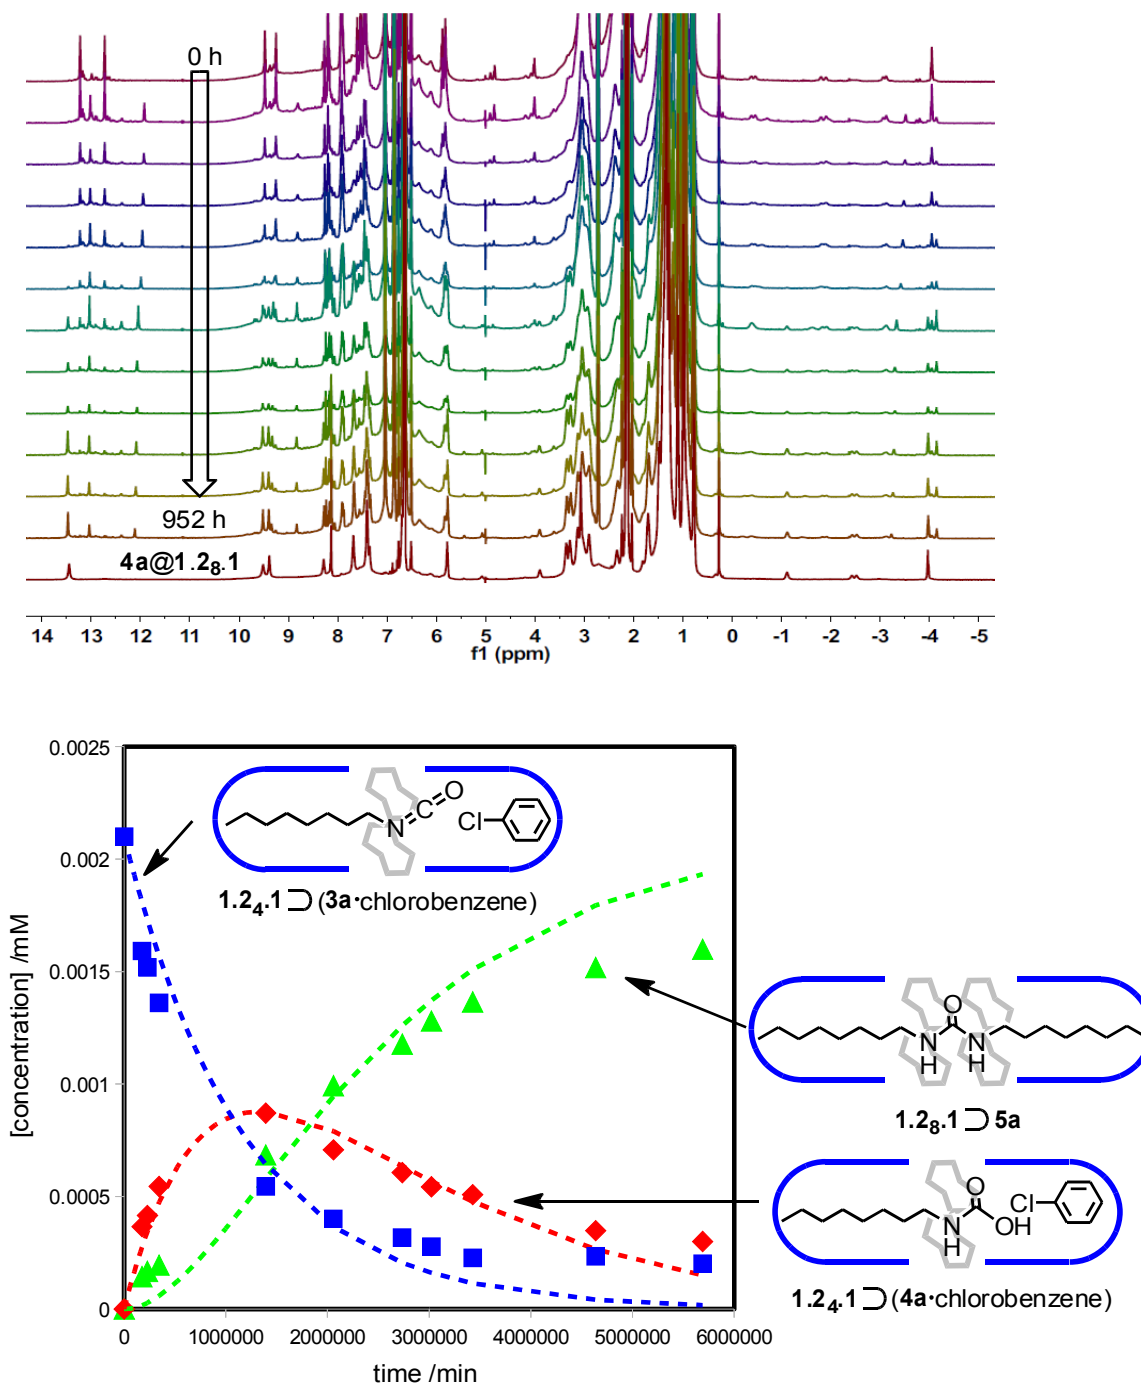

**Fig. S-17** Reaction profile of 1.2.4.1⊃(3a-chlorobenzene). The curves calculated by assuming consecutive and nonlinear fitting using integrations of CH<sub>3</sub> proton of each components.

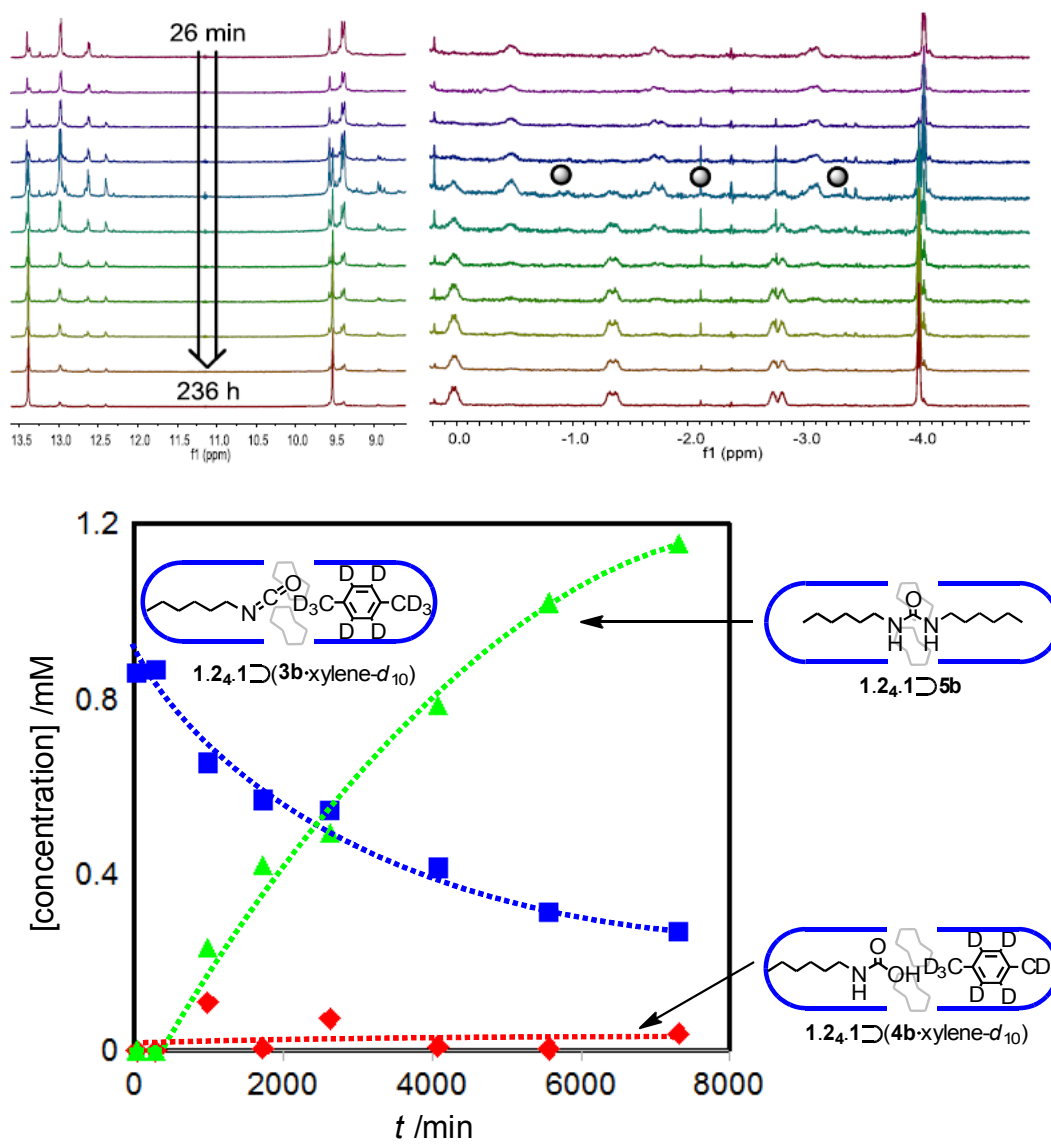

**Fig. S-18** Reaction profile of 1.2.4.1D(3b-xylene-*d*<sub>10</sub>). The curves calculated by assuming consecutive and nonlinear fitting using integrations of CH<sub>3</sub> proton of each components.

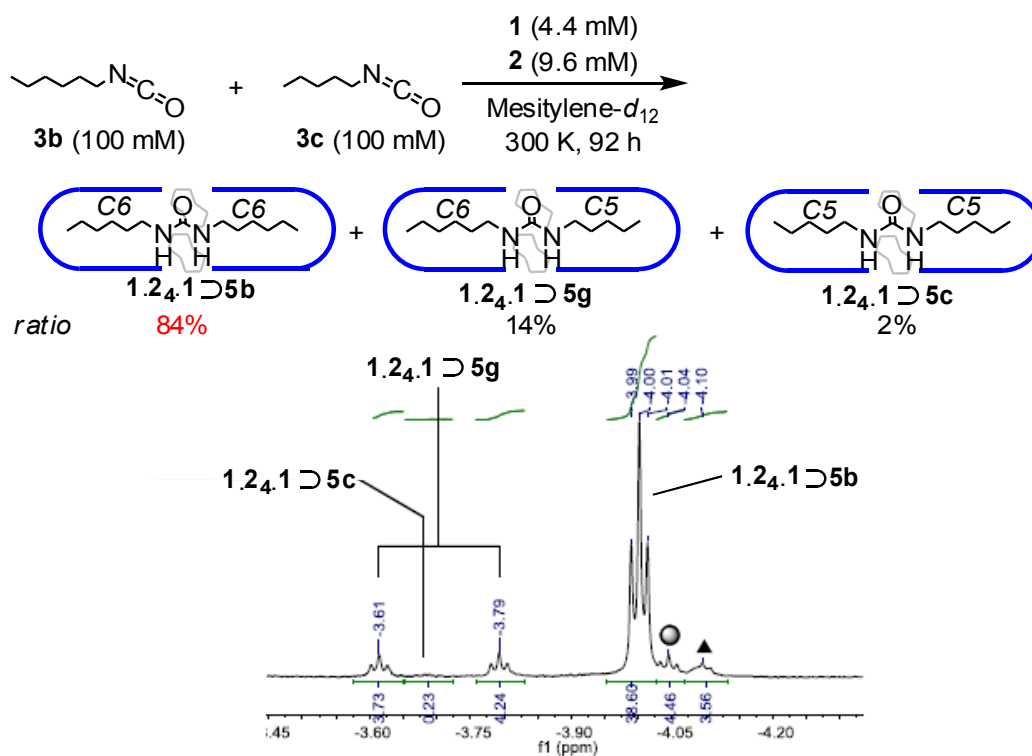

**Fig. S-19** Competition experiment of a reaction of **3b** and **3c** in the presence of **1.2,4.1**. Circle, **1.2,4.1**  $\supset$  (**3b**·xylene- $d_{10}$ ); triangle, the reaction intermediate **1.2,4.1**  $\supset$  (**4b**·xylene- $d_{10}$ ).

File : F:\data\ROUTINE\2011\mar11\030311\8643less.D  
 Operator :  
 Acquired : 4 Mar 2011 15:50 using AcqMethod ROUTINE2007\_10MIN.M  
 Instrument : Instrument #1  
 Sample Name : 8643less  
 Misc Info :  
 Vial Number : 3

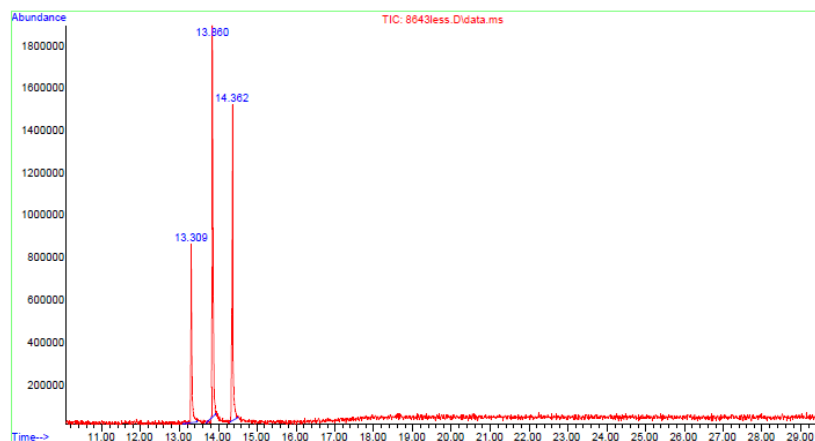

TIC: 8643less.D\data.ms  
 8643less

| Peak # | Ret Time | Type | Width | Area     | Start Time | End Time |
|--------|----------|------|-------|----------|------------|----------|
| 1      | 13.309   | B5   | 0.077 | 13512564 | 13.101     | 13.449   |
| 2      | 13.860   | BV   | 0.042 | 34182573 | 13.693     | 13.938   |
| 3      | 14.362   | BV   | 0.038 | 22419890 | 14.303     | 14.499   |

**Fig. S-20** Competition experiment of the reaction of **3b** with **3c** in DMSO- $d_6$ .
